# Supplementary material for: Charge-transfer induced multifunctional BCP:Ag complexes for semi-transparent perovskite solar cells with a record fill factor of 80.1%
Source: Royal Society of Chemistry journal article supplement (doi:10.1039/d1ta01180d), 2021-01-01
Supplement: d1ta01180d1.pdf [file d1ta01180d1.pdf]

## Supporting Information

### **Charge-transfer induced multifunctional BCP:Ag complexes for semi-transparent perovskite solar cells with a record fill-factor of 80.1%**

Zhiqin Ying,<sup>abc</sup> Xi Yang,<sup>b</sup> Jingming Zheng,<sup>b</sup> Yudong Zhu,<sup>a</sup> Jingwei Xiu,<sup>a</sup> Wei Chen,<sup>a</sup> Chunhui Shou,<sup>d</sup> Jiang Sheng,<sup>b</sup> Yuheng Zeng,<sup>b</sup> Baojie Yan,<sup>b</sup> Hui Pan,<sup>\*c</sup> Jichun Ye,<sup>\*b</sup> and Zhubing He<sup>\*a</sup>

<sup>a</sup> Department of Materials Science and Engineering, Shenzhen Key Laboratory of Full Spectral Solar Electricity Generation (FSSEG), Southern University of Science and Technology, No. 1088, Xueyuan Rd., Shenzhen, 518055, Guangdong, China.

<sup>b</sup> Ningbo Institute of Materials Technology and Engineering, Chinese Academy of Sciences (CAS), Ningbo City 315201, PR China

<sup>c</sup> Institute of Applied Physics and Materials Engineering, University of Macau, Macao SAR, 999078 China

<sup>d</sup> Zhejiang Energy Group R&D, Hangzhou 310003, China

Table S1 Comparison to the state-of-the-art buffer layer/transparent conductive electrodes stacks for semitransparent perovskite solar cells.

|              | <b>Buffer layer/TCEs</b>       | <b>PCE</b> | <b><math>J_{sc}</math></b><br><b>mA/cm<sup>2</sup></b> | <b><math>V_{oc}</math></b><br><b>V</b> | <b><math>FF</math></b> | <b>Ref</b>       |
|--------------|--------------------------------|------------|--------------------------------------------------------|----------------------------------------|------------------------|------------------|
| <b>n-i-p</b> | <b>MoO<sub>x</sub>/ITO</b>     | 6.2%       | 14.5                                                   | 0.82                                   | 0.52                   | [1]              |
|              | <b>MoO<sub>x</sub>/IZO</b>     | 10.3%      | 17.5                                                   | 0.87                                   | 0.68                   | [2]              |
|              | <b>MoO<sub>x</sub>/AZO</b>     | 12.1%      | 16.7                                                   | 1.03                                   | 0.70                   | [3]              |
|              | <b>MoO<sub>x</sub>/InOx:H</b>  | 14.2%      | 17.4                                                   | 1.10                                   | 0.73                   | [4]              |
|              | <b>ITO NPs/ITO</b>             | 15.1%      | 19.9                                                   | 1.10                                   | 0.69                   | [5]              |
|              | <b>MoO<sub>x</sub>/IOH/ITO</b> | 16.4%      | 20.1                                                   | 1.07                                   | 0.76                   | [6]              |
|              | <b>MoO<sub>x</sub>/ITO</b>     | 16.7%      | 22.0                                                   | 1.01                                   | 0.75                   | [7]              |
|              | <b>Ag NPs/ITO</b>              | 17.7%      | 21.5                                                   | 1.06                                   | 0.77                   | [8]              |
|              | <b>MoO<sub>x</sub>/IZO</b>     | 19.0%      | 22.3                                                   | 1.12                                   | 0.76                   | [9]              |
| <b>p-i-n</b> | <b>AZO NPs/ITO</b>             | 12.3%      | 16.5                                                   | 0.95                                   | 0.78                   | [10]             |
|              | <b>ITO</b>                     | 13.6%      | 16.7                                                   | 1.08                                   | 0.75                   | [11]             |
|              | <b>SnO<sub>x</sub>/ZTO/ITO</b> | 15.8%      | 20.3                                                   | 0.97                                   | 0.79                   | [12]             |
|              | <b>ZnO NPs/ZnO/ITO</b>         | 16.4%      | 20.3                                                   | 1.07                                   | 0.76                   | [13]             |
|              | <b>SnO<sub>x</sub>/ZTO/IZO</b> | 18.2%      | 20.8                                                   | 1.12                                   | 0.78                   | [14]             |
|              | <b>BCP:Ag/IZO</b>              | 18.19%     | 21.1                                                   | 1.08                                   | 0.801                  | <b>This work</b> |

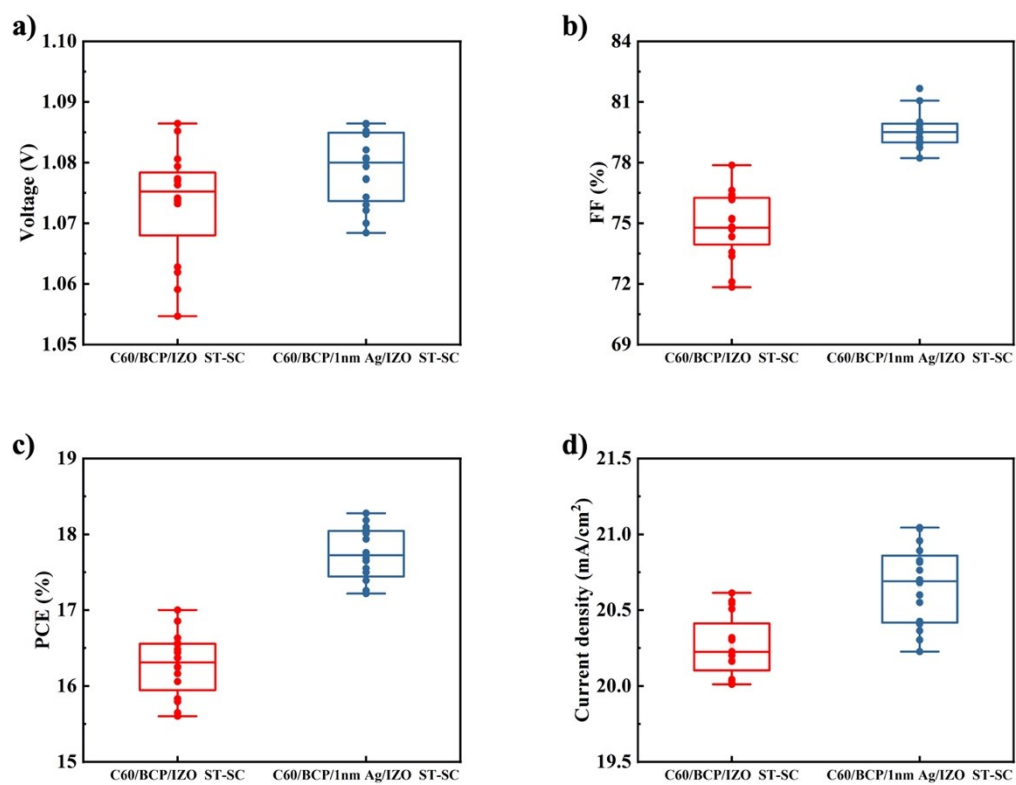

Fig. S1 The photovoltaic parameters statistics of the semi-transparent perovskite solar cell with and without Ag.

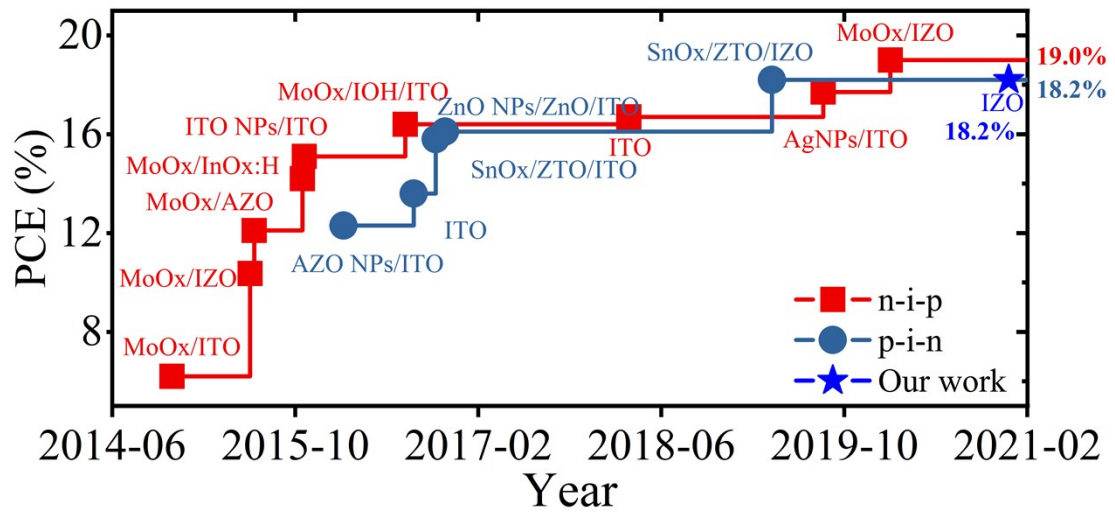

Fig. S2 The efficiency history of semi-transparent perovskite solar cell (illuminated from the glass side).

Table S2 The  $J$ - $V$  parameters of the semi-transparent solar cells with different Ag thickness.

| <b>Ag thickness</b> | <b><math>V_{oc}</math> (V)</b> | <b><math>J_{sc}</math> (mA/cm<sup>2</sup>)</b> | <b><math>FF</math> (%)</b> | <b>PCE (%)</b> |
|---------------------|--------------------------------|------------------------------------------------|----------------------------|----------------|
| 0 nm                | 1.073                          | 20.95                                          | 71.8                       | 16.14          |
| 0.5 nm              | 1.075                          | 21.02                                          | 78.7                       | 17.78          |
| 1 nm                | 1.076                          | 21.14                                          | 80.1                       | 18.19          |
| 2 nm                | 1.076                          | 20.99                                          | 80.0                       | 18.06          |

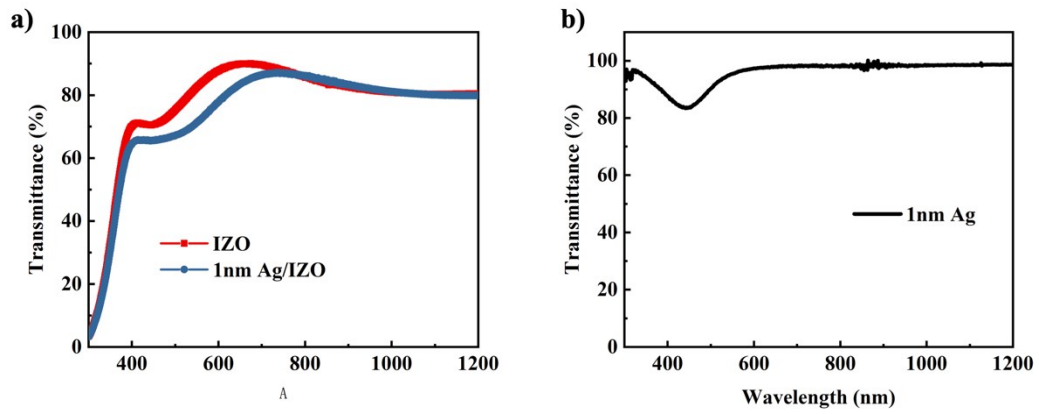

Fig. S3 a) The optical transmittance of the IZO cathodes in the wavelength range of 300-1200 nm with and without Ag layer. b) The optical transmittance of the 1nm Ag layer in the wavelength range of 300-1200 nm.

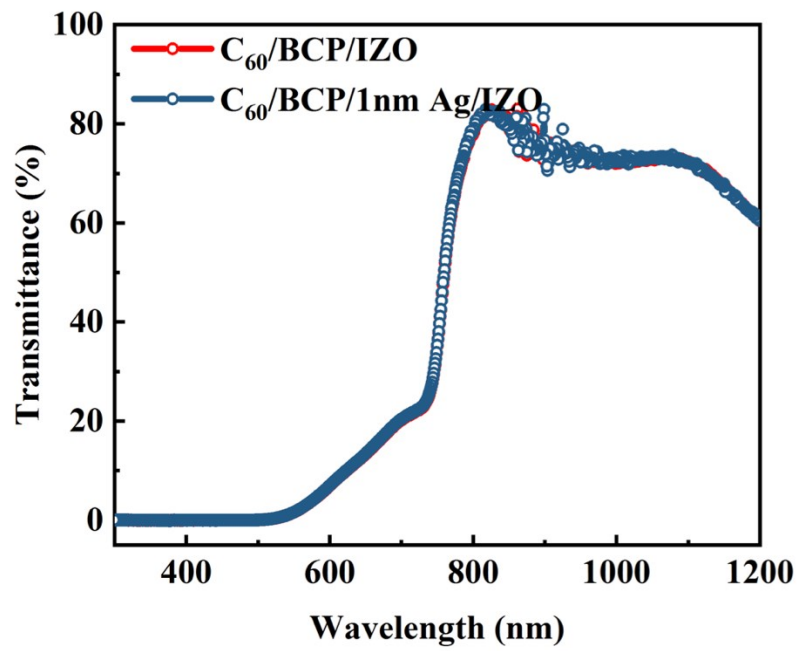

Fig. S4 The optical transmittance of the semi-transparent perovskite solar cell in the wavelength range of 300–1200 nm with and without Ag layer. The transmittance of the semi-transparent perovskite solar cell in the wavelength range between 800 nm to 1200 nm is about 73.1%

Table S3 Summary of the PL lifetime parameters from fitting curves of the PL decay measurements.

| <b>Sample</b>                        | <b>A<sub>1</sub>(%)</b> | <b><math>\tau_1</math>(ns)</b> | <b>A<sub>2</sub>(%)</b> | <b><math>\tau_2</math>(ns)</b> | <b><math>\tau_{\text{Avg.}}</math>(ns)</b> |
|--------------------------------------|-------------------------|--------------------------------|-------------------------|--------------------------------|--------------------------------------------|
| <b>PVK/C<sub>60</sub>/BCP/IZO</b>    | 10.73                   | 1.76                           | 89.27                   | 14.68                          | 14.48                                      |
| <b>PVK/C<sub>60</sub>/BCP/Ag/IZO</b> | 26.12                   | 0.84                           | 73.88                   | 8.12                           | 7.86                                       |



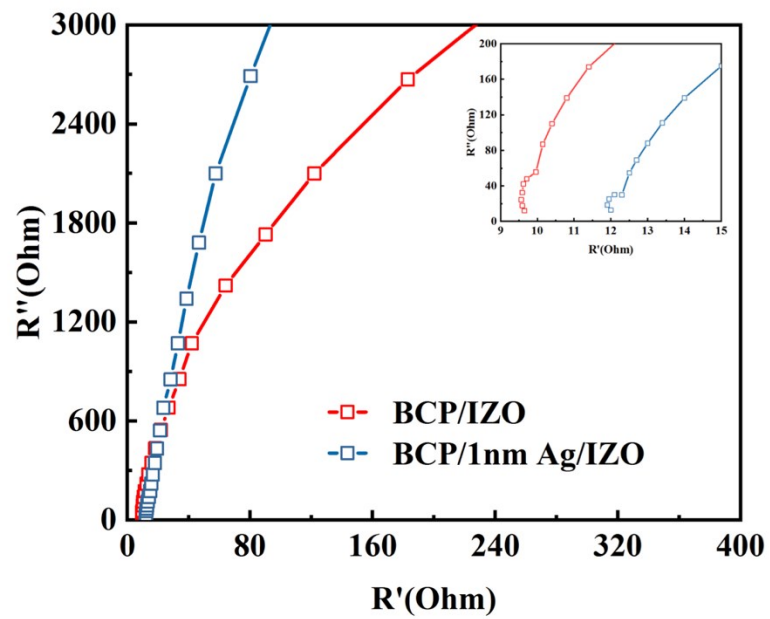

Fig. S5 Nyquist plots obtained from the electrochemical impedance spectroscopy (EIS) measurement of semi-transparent perovskite solar cells with and without Ag.

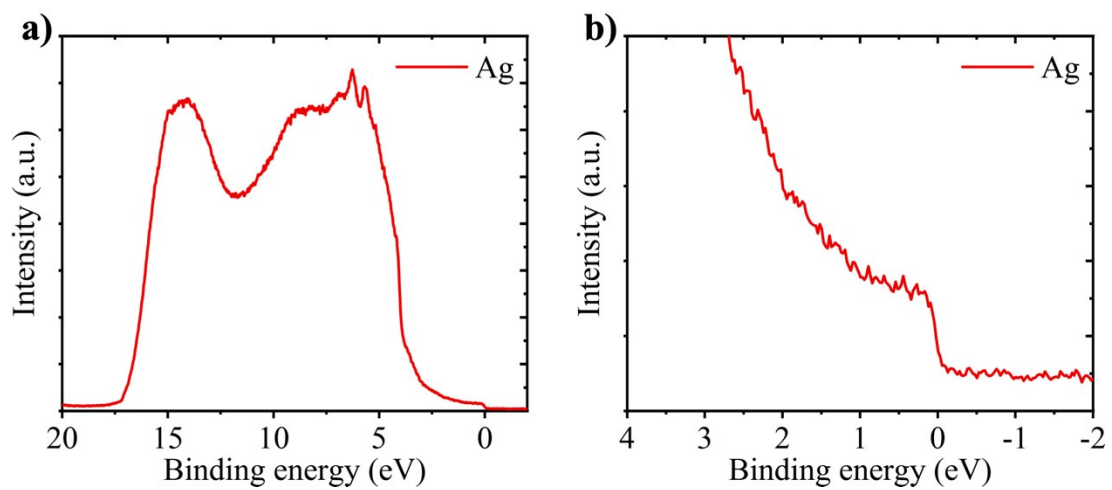

Fig. S6 a) The UPS spectrum and b) the Fermi edge for the thick Ag film

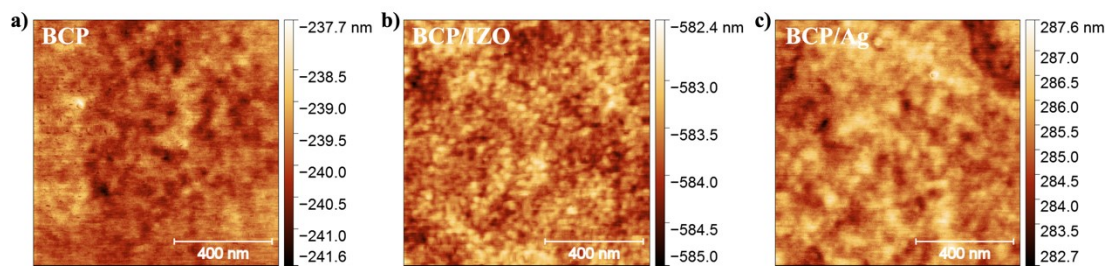

Fig. S7 The top-view AFM images of a) BCP, b) BCP/IZO and c) BCP/Ag.

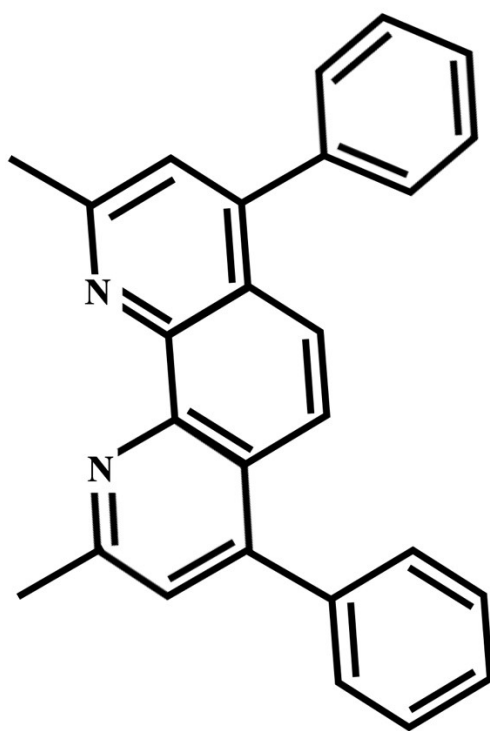

Fig. S8 The chemical structure of BCP

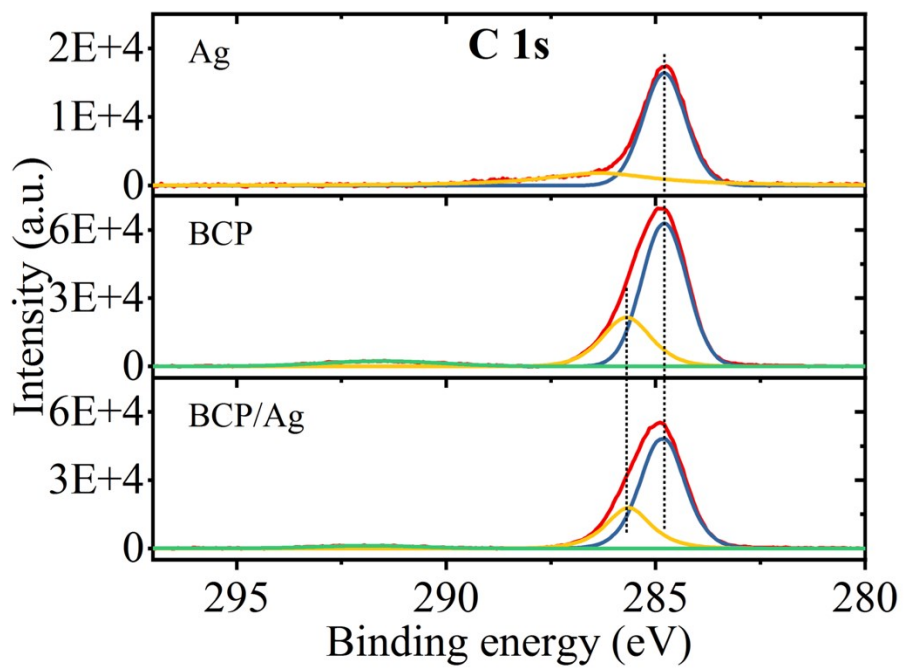

Fig. S9 The XPS high resolution spectra of C 1s for Ag, BCP and Ag/BCP.

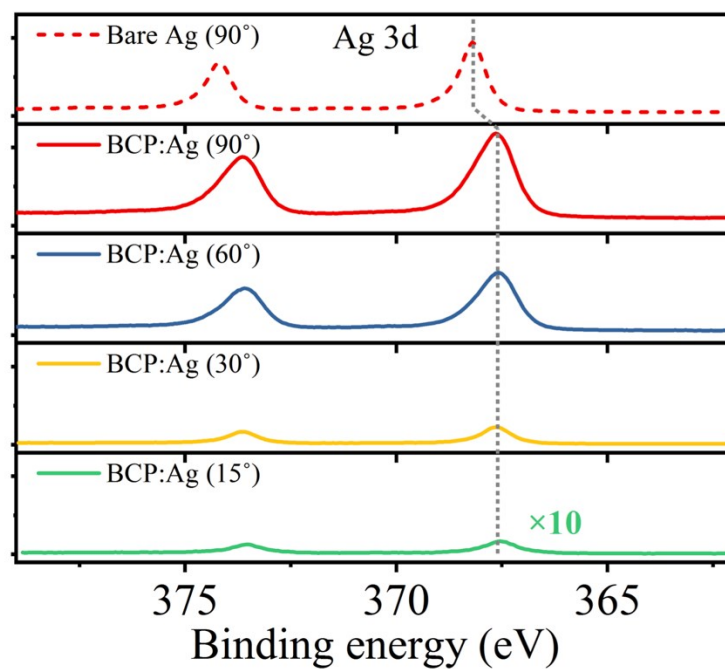

Fig. S10 The angle-resolved XPS (ARXPS) measurements with 90°, 60°, 30°, and 15° photoelectron take-off angles for BCP/Ag. The bare Ag measurements with 90° was also shown as the reference.

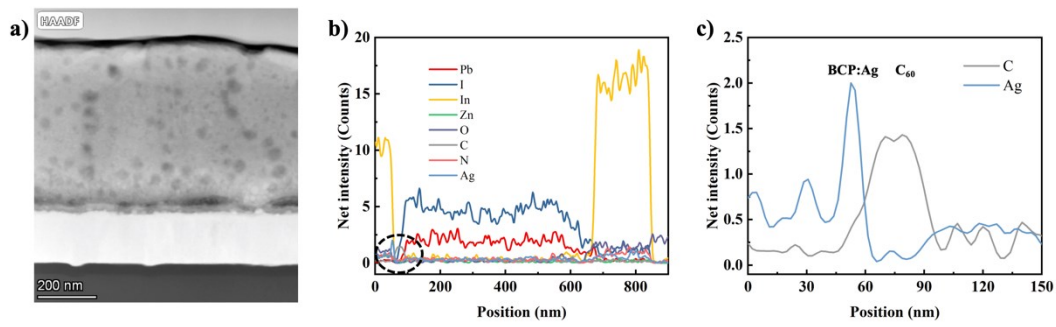

Fig. S11 a) The HAADF image and b) the corresponding depth-profiling EELS data of BCP:Ag based semi-transparent device. c) The EELS line scan across the IZO/BCP:Ag/C<sub>60</sub> contact stack.

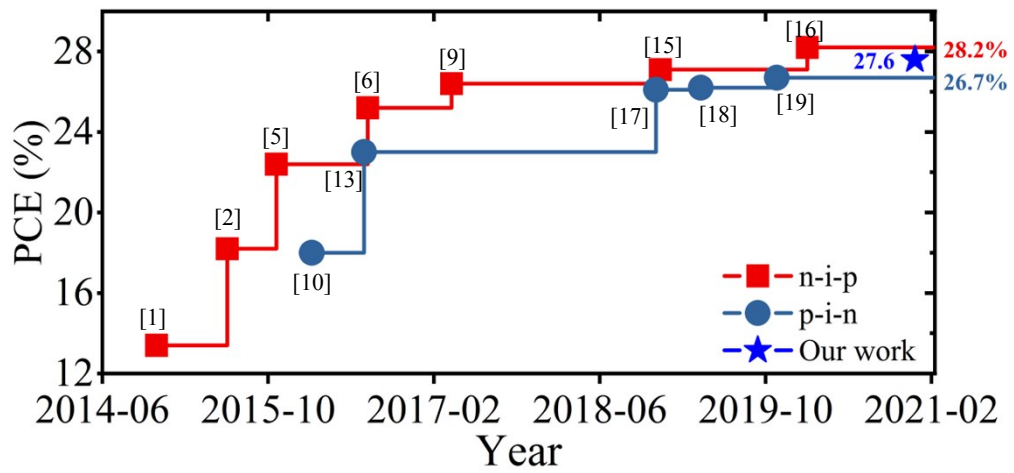

Fig. S12 The efficiency history of four terminal perovskite/Si tandem solar cell with n-i-p [39, 40, 42, 43, 45, 50, 51] and p-i-n[46, 49, 52-54].



## References

- [1] P. Löper, S.-J. Moon, S. Martín de Nicolas, B. Niesen, M. Ledinsky, S. Nicolay, J. Bailat, J.-H. Yum, S. De Wolf, C. Ballif, *Phys. Chem. Chem. Phys.* 2015, 17, 1619.
- [2] J. Werner, G. Dubuis, A. Walter, P. Löper, S.-J. Moon, S. Nicolay, M. Morales-Masis, S. De Wolf, B. Niesen, C. Ballif, *Sol. Energy Mater. Sol. Cells* 2015, 141, 407.
- [3] L. Kranz, A. Abate, T. Feurer, F. Fu, E. Avancini, J. Löckinger, P. Reinhard, S. M. Zakeeruddin, M. Grätzel, S. Buecheler, A. N. Tiwari, *J. Phys. Chem. Lett.* 2015, 6, 2676.
- [4] F. Fu, T. Feurer, T. Jäger, E. Avancini, B. Bissig, S. Yoon, S. Buecheler, A. N. Tiwari, *Nat. Commun.* 2015, 6, 8932.
- [5] D. P. McMeekin, G. Sadoughi, W. Rehman, G. E. Eperon, M. Saliba, M. T. Hörantner, A. Haghighirad, N. Sakai, L. Korte, B. Rech, M. B. Johnston, L. M. Herz, H. J. Snaith, *Science* 2016, 351, 151.
- [6] J. Werner, L. Barraud, A. Walter, M. Bräuninger, F. Sahli, D. Sacchetto, N. Tétreault, B. Paviet-Salomon, S.-J. Moon, C. Allebé, M. Despeisse, S. Nicolay, S. De Wolf, B. Niesen, C. Ballif, *ACS Energy Lett.* 2016, 1, 474.
- [7] M. Jaysankar, M. Filipič, B. Zielinski, R. Schmager, W. Song, W. Qiu, U. W. Paetzold, T. Aernouts, M. Debucquoy, R. Gehlhaar, J. Poortmans, *Energy Environ. Sci.* 2018, 11, 1489.
- [8] H. A. Dewi, H. Wang, J. Li, M. Thway, R. Sridharan, R. Stangl, F. Lin, A. G. Aberle, N. Mathews, A. Bruno, S. Mhaisalkar, *ACS Appl. Mater. Interfaces* 2019, 11, 34178.
- [9] B. Chen, S.-W. Baek, Y. Hou, E. Aydin, M. De Bastiani, B. Scheffel, A. Proppe, Z. Huang, M. Wei, Y.-K. Wang, E.-H. Jung, T. G. Allen, E. Van Kerschaver, F. P. García de Arquer, M. I. Saidaminov, S. Hoogland, S. De Wolf, E. H. Sargent, *Nat. Commun.* 2020, 11, 1257.
- [10] K. A. Bush, C. D. Bailie, Y. Chen, A. R. Bowring, W. Wang, W. Ma, T. Leijtens, F. Moghadam, M. D. McGehee, *Adv. Mater.* 2016, 28, 3937.
- [11] Z. Yang, A. Rajagopal, C.-C. Chueh, S. B. Jo, B. Liu, T. Zhao, A. K. Y. Jen, *Adv. Mater.* 2016, 28, 8990.
- [12] G. E. Eperon, T. Leijtens, K. A. Bush, R. Prasanna, T. Green, J. T.-W. Wang, D. P. McMeekin, G. Volonakis, R. L. Milot, R. May, A. Palmstrom, D. J. Slotcavage, R. A. Belisle, J. B. Patel, E. S. Parrott, R. J. Sutton, W. Ma, F. Moghadam, B. Conings, A.

- Babayigit, H.-G. Boyen, S. Bent, F. Giustino, L. M. Herz, M. B. Johnston, M. D. McGehee, H. J. Snaith, *Science* 2016, 354, 861.
- [13] D. Zhang, M. Najafi, V. Zardetto, M. Dorenkamper, W. Verhees, X. Zhou, A. Senes, A. Gutjahr, I. Romijn, S. Veenstra, B. Geerligs, M. Creatore, T. Aernouts, R. Andriessen, presented at 2018 IEEE 7th World Conference on Photovoltaic Energy Conversion (WCPEC) (A Joint Conference of 45th IEEE PVSC, 28th PVSEC & 34th EU PVSEC), 10-15 June 2018, 2018.
- [14] J. Tong, Z. Song, D. H. Kim, X. Chen, C. Chen, A. F. Palmstrom, P. F. Ndione, M. O. Reese, S. P. Dunfield, O. G. Reid, J. Liu, F. Zhang, S. P. Harvey, Z. Li, S. T. Christensen, G. Teeter, D. Zhao, M. M. Al-Jassim, M. F. A. M. van Hest, M. C. Beard, S. E. Shaheen, J. J. Berry, Y. Yan, K. Zhu, *Science* 2019, 364, 475.
- [15] T. Duong, Y. Wu, H. Shen, J. Peng, X. Fu, D. Jacobs, E. C. Wang, T. C. Kho, K. C. Fong, M. Stocks, E. Franklin, A. Blakers, N. Zin, K. McIntosh, W. Li, Y. B. Cheng, T. P. White, K. Weber, K. Catchpole, *Adv. Energy Mater.* 2017, 7.
- [16] M. Jaysankar, B. A. L. Raul, J. Bastos, C. Burgess, C. Weijtens, M. Creatore, T. Aernouts, Y. Kuang, R. Gehlhaar, A. Hadipour, J. Poortmans, *ACS Energy Lett.* 2019, 4, 259.
- [17] B. Chen, Y. Bai, Z. Yu, T. Li, X. Zheng, Q. Dong, L. Shen, M. Boccard, A. Gruverman, Z. Holman, J. Huang, *Adv. Energy Mater.* 2016, 6, 1601128.
- [18] E. Aydin, M. De Bastiani, X. Yang, M. Sajjad, F. Aljamaan, Y. Smirnov, M. N. Hedhili, W. Liu, T. G. Allen, L. Xu, E. Van Kerschaver, M. Morales-Masis, U. Schwingenschlögl, S. De Wolf, *Adv. Funct. Mater.* 2019, 29, 1901741.
- [19] A. Rohatgi, K. Zhu, J. Tong, D. H. Kim, E. Reichmanis, B. Rounsaville, V. Prakash, Y. Ok, *Ieee J Photovolt* 2020, 10, 417.
